# Supplementary material
Source: PubMed Central journal article supplement (PMC10870134)
Supplement: mmc1.pdf [file mmc1.pdf]

**The American Journal of Human Genetics, Volume 111**

**Supplemental information**

**Adaptation of a mutual exclusivity framework  
to identify driver mutations  
within oncogenic pathways**

**Xinjun Wang, Caroline Kostrzewa, Allison Reiner, Ronglai Shen, and Colin Begg**

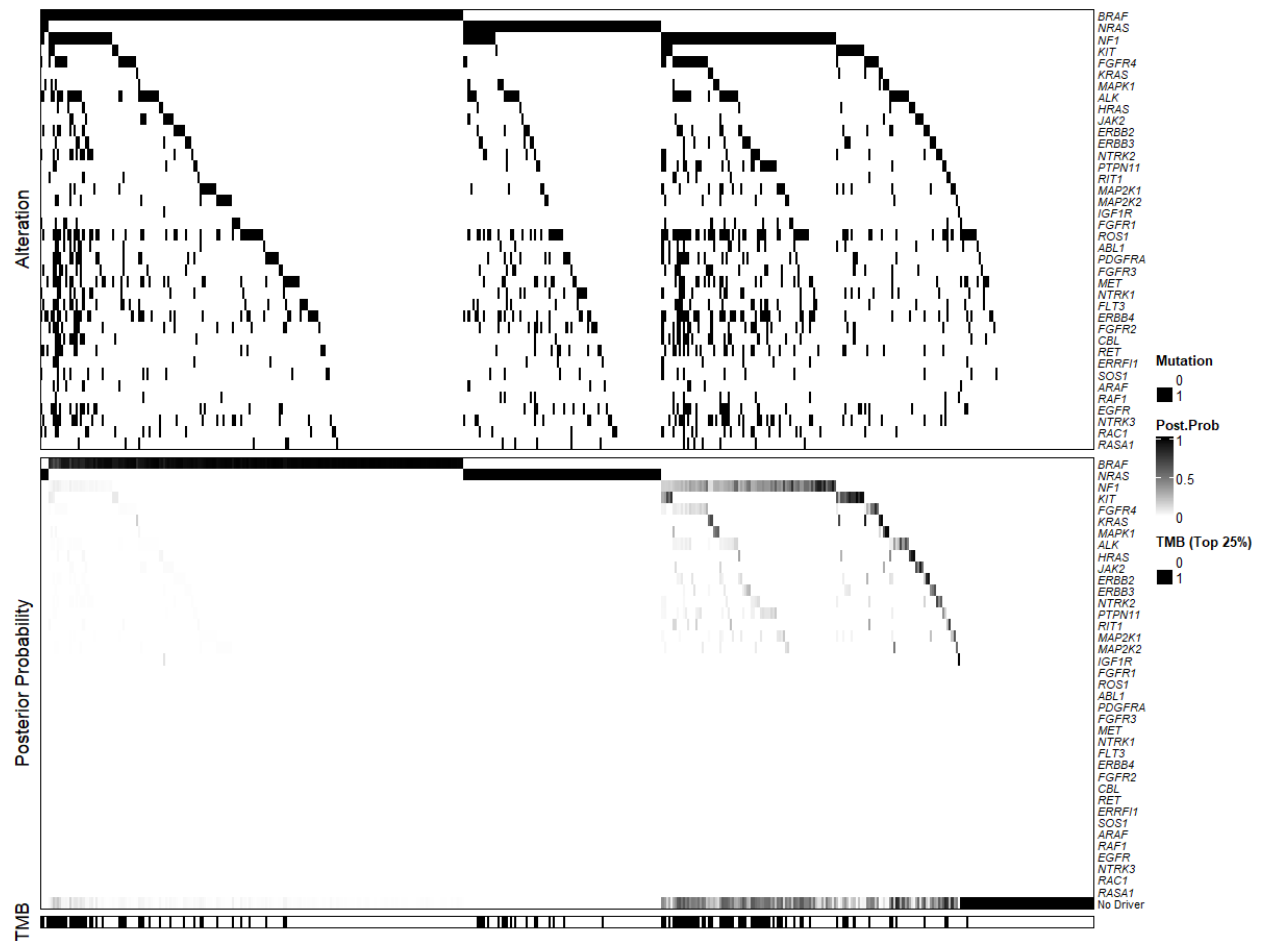

**Figure S1: Illustration of the Observed Binary Mutation Status, Estimated Posterior Probability of Driver Mutation, and the Distribution of Binary Tumor Mutational Burden (TMB) for the RTK-RAS Pathway from the InterMEL Study. All 38 genes are included.**

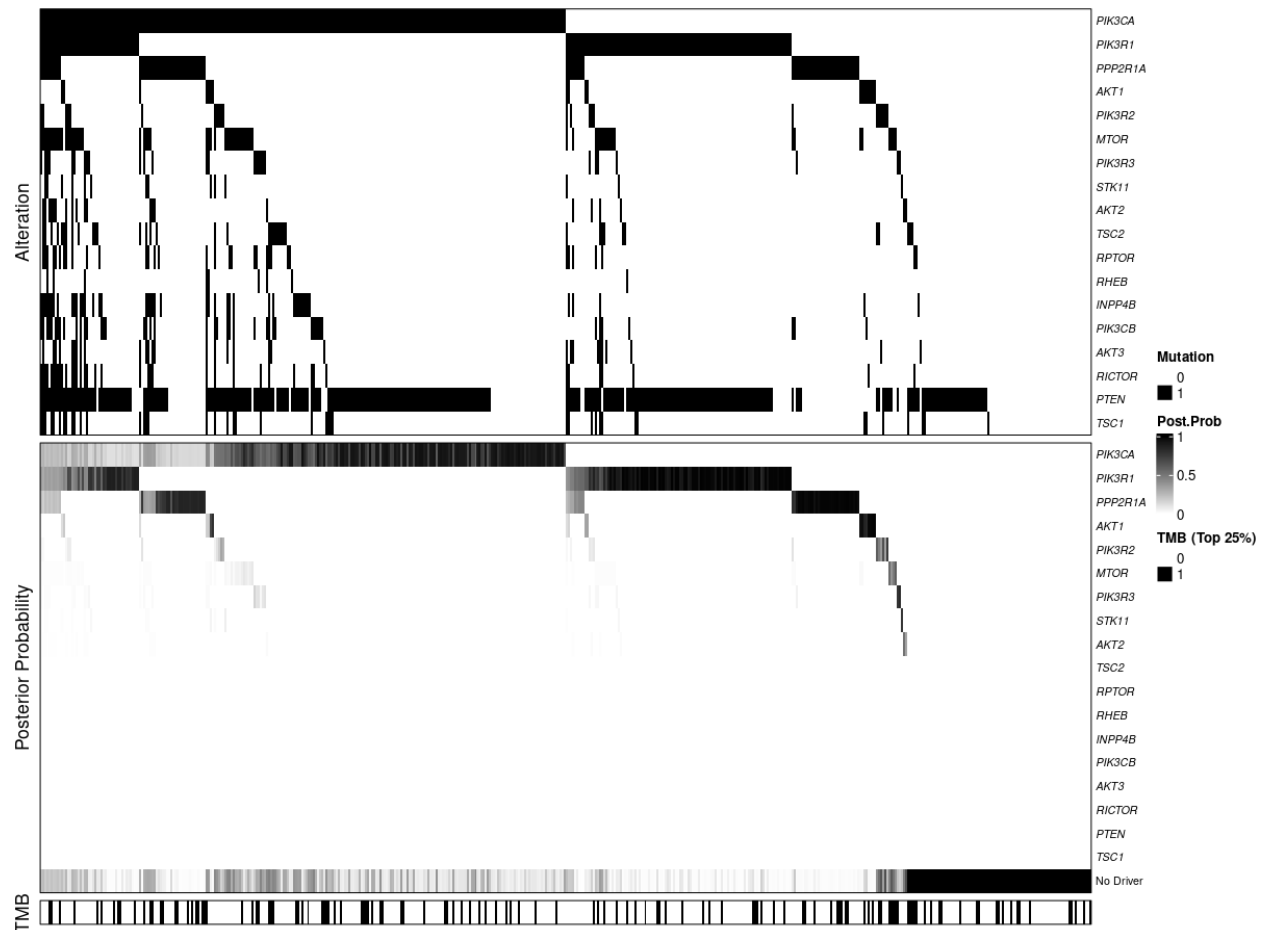

**Figure S2. Illustration of the Observed Binary Mutation Status, Estimated Posterior Probability of Driver Mutation, and the Distribution of Binary Tumor Mutational Burden (TMB) for the PI3K Pathway from TCGA-UCEC Data.**

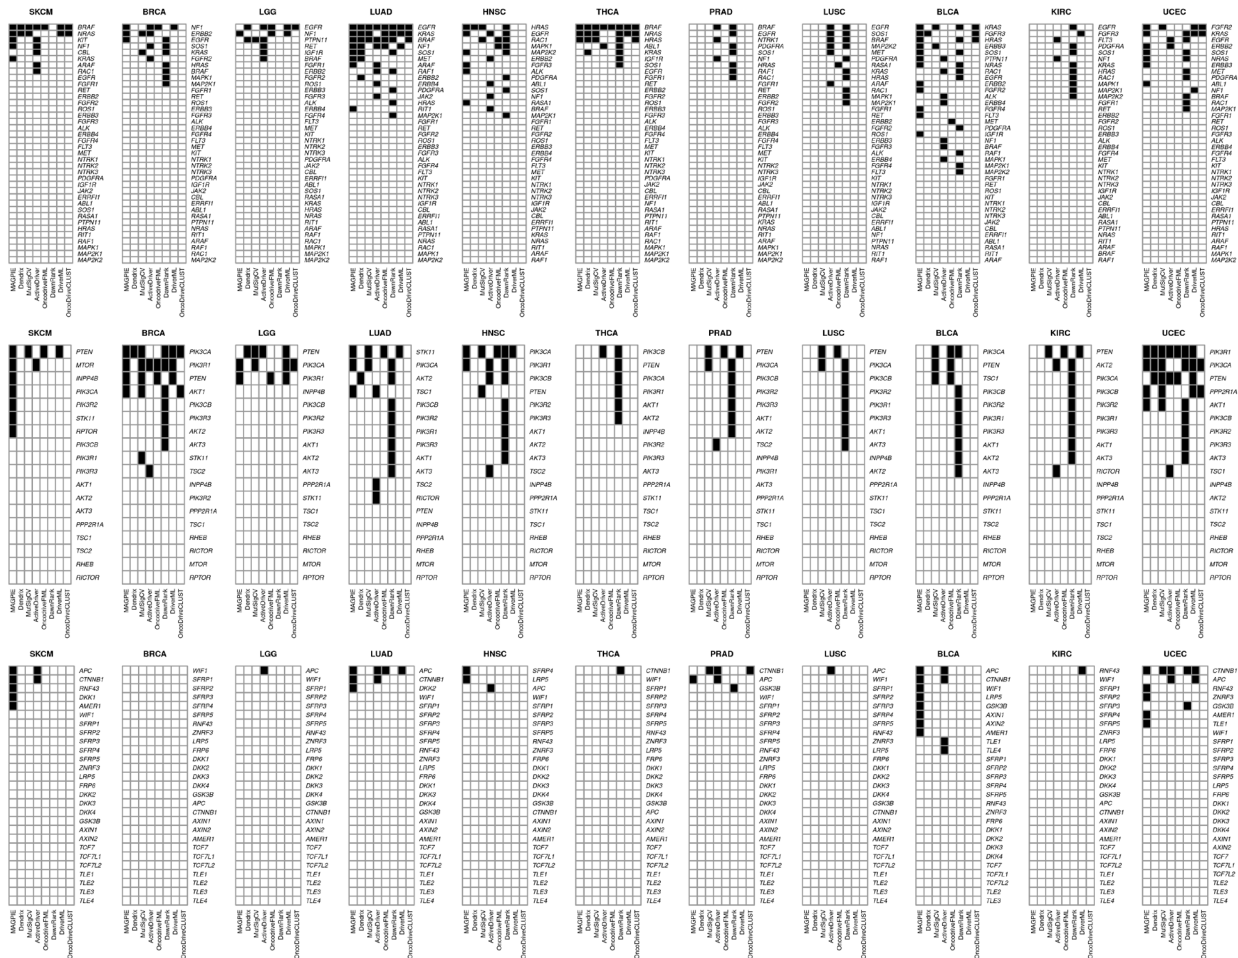

**Figure S3. Driver Gene Nomination by Different Methods for All Eleven Cancer Sites. A: RTK-RAS pathway; B: PI3K pathway; C: Wnt pathway. TCGA disease codes and abbreviations: BRCA, breast cancer; LGG, lower grade glioma; UCEC, uterine corpus endometrial carcinoma; LUAD, lung adenocarcinoma; HNSC, head and neck squamous cell carcinoma; THCA, papillary thyroid carcinoma; PRAD: Prostate adenocarcinoma; LUSC, lung squamous cell carcinoma; BLCA, urothelial bladder cancer; SKCM, cutaneous melanoma; KIRC: clear cell kidney carcinoma.**
